# Supplementary material
Source: publisher figshare collection journal article supplement (https://tandf.figshare.com/articles/dataset/_/6287147)
Supplement: Supplementary file 1 [file 1]

Archive with 2 entries (2 files):
- ICOT 1335748 - SUPPFIG.pdf
- ICOT 1335748 - SUPPFILE.pdf
