# Supplementary material
Source: publisher figshare collection journal article supplement (https://tandf.figshare.com/articles/dataset/_/6287147)

**SUPPLEMENTARY FIGURE – ICOT 1335748**

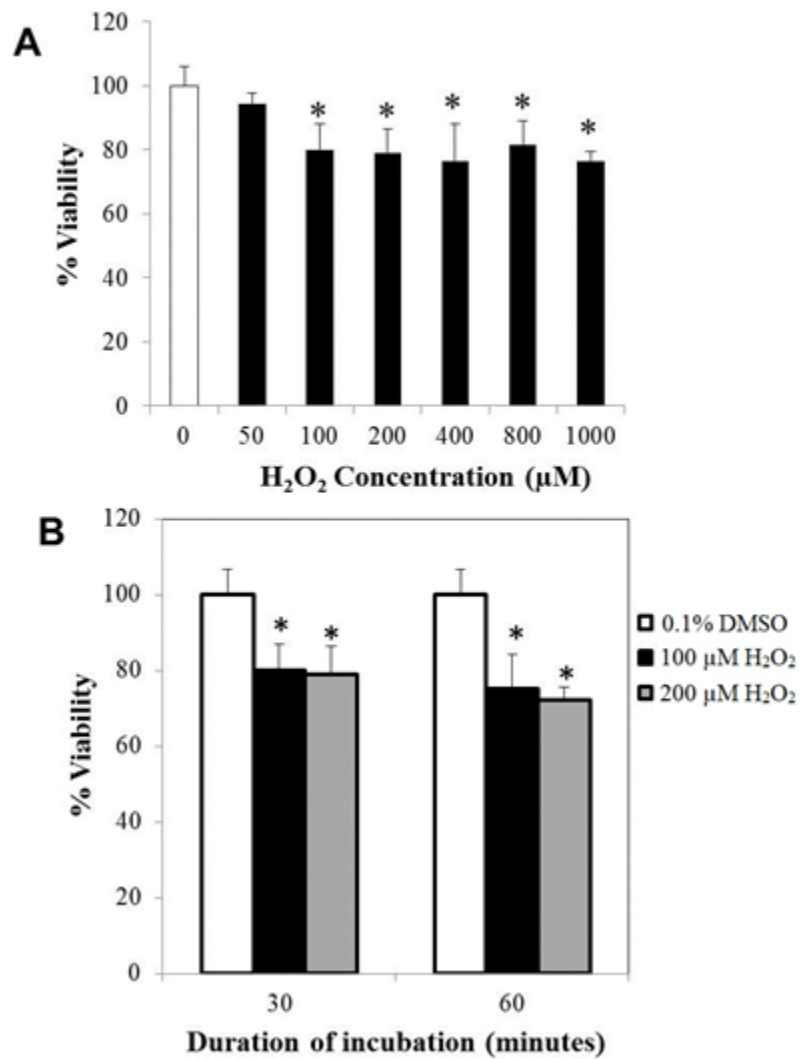

Supplement: Supplementary file 1 [file 1 › ICOT 1335748 - SUPPFIG.pdf]
